# Supplementary material for: A specific HeLa cell-labelled and lysosome-targeted upconversion fluorescent probe: PEG-modified Sr2YbF7:Tm3+
Source: Royal Society of Chemistry journal article supplement (doi:10.1039/c7nr07093d), 2017-01-01
Supplement: c7nr07093d1.pdf [file c7nr07093d1.pdf]

Support Information for:

## **The difunctional applications of modified $\text{Sr}_2\text{YbF}_7:\text{Tm}^{3+}$ upconversion nanocrystals**

Li-Jun Xiang, Hui-Hui Zhang, Hong Li, Lin Kong, Hong-Ping Zhou, Jie-Ying Wu, Yu-Peng Tian, Jie Zhang and Yi-Fu Mao

### **Content**

S1. Experimental

S2 The characterization of as-prepared  $(1-x)\text{SrF}_2 \cdot x\text{YbF}_3$

S3 The characterization of  $\text{Sr}_2\text{YbF}_7:\text{Tm}^{3+}$  NCs

S4 Fluorescence images of HeLa cells co-labelled with the UCNCs@PEG

S5 The thermogravimetric analysis of the UCNCs@PEG

### **S1 Experimental**

#### **S1.1 Materials**

$\text{SrCl}_2$  (99.99%) and  $\text{Ln}(\text{NO}_3)_3 \cdot 6\text{H}_2\text{O}$  ( $\text{Ln} = \text{Yb}, \text{Tm}$ ) were purchased from Sigma-Aldrich. Poly (ethylene glycol) methyl ether (PEG, average molecular = 6000) was purchased from Sinopharm Chemical Reagent Co., China. Other chemicals are of analytical grade and used as received without further purification.

#### **S1.2 Synthesis of $(1-x)\text{SrF}_2 \cdot x\text{YbF}_3$ NCs**

The NCs were prepared with oleic acid as capping ligand through a simple solvothermal method. In detail, 10.5 mmol NaOH, 10 mL alcohol and 20 mL oleic acid were firstly added into a beaker in turn under vigorous agitation to form transparent homogeneous solution. Then,  $(1-x)$  mmol  $\text{SrCl}_2$  (1 M) and  $x$  mmol  $\text{Yb}(\text{NO}_3)_3$  (1 M) aqueous solution were introduced into the former solution. At last, 4 mmol  $\text{NH}_4\text{F}$  (1 M) deionized water solution was added, and the mixture was vigorously stirred for 30 min. The mixture was transferred into a 50 mL stainless teflon-lined autoclave, and heated at 200 °C for 24 h. Then, cooled down to room temperature. The products were collected and washed with ethanol and deionized water in turn for several times, and then dried in air at 40 °C for 12 h.<sup>1,2</sup>

The pure phase  $\text{Sr}_2\text{YbF}_7:\text{Tm}^{3+}$  NCs were prepared *via* the above procedure when  $x = 0.4$ , changing  $\text{Tm}^{3+}$  usage from 0.4% to 0.8%.

### S1.3 *In vitro* UC fluorescent bioimaging

The UCNCs@PEG with concentration of 250  $\mu\text{g}/\text{mL}$  were incubated with HeLa cells at 37 °C for 0.5 h under 5%  $\text{CO}_2$ . After washed with PBS for three times, the cells were visualized under a confocal laser scanning microscope (ZEISS710) by a laser excitation source of 980 nm.<sup>3,4</sup>

### S1.4 Characterization

The crystal structures of as-prepared samples were characterized by a powder X-ray diffraction (XRD) apparatus (D/Max 2500). The morphology, and element constitution of the samples were characterized by transmission electron microscopy (TEM) and high resolution transmission electron microscopy (HRTEM, JEOL 2100) equipped with an Oxford instrument energy dispersive X-ray spectroscopy (EDS) system at the accelerating voltage of 200 kV. Upconversion emission spectra were recorded by a fluorescence spectrophotometer (R500) under the excitation of a 980 nm laser.<sup>4,5</sup> The surface structure of PEG-modified NCs was tested by Fourier transform infrared spectra (Vertex80+Hyperion2000/Vertex80+ Hyperion2000).

## S2. The characterization of as-prepared $(1-x)\text{SrF}_2 \cdot x\text{YbF}_3$

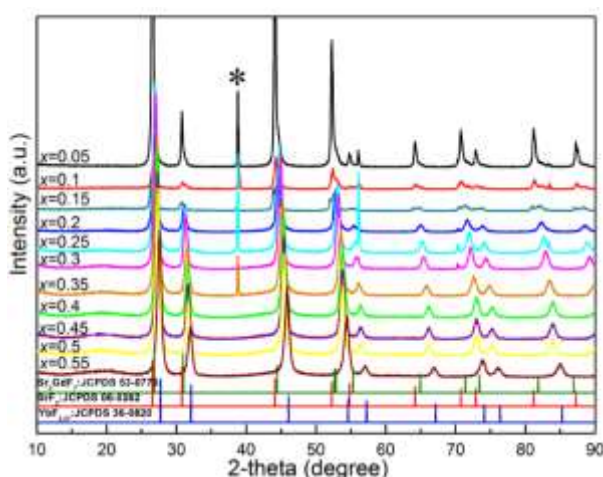

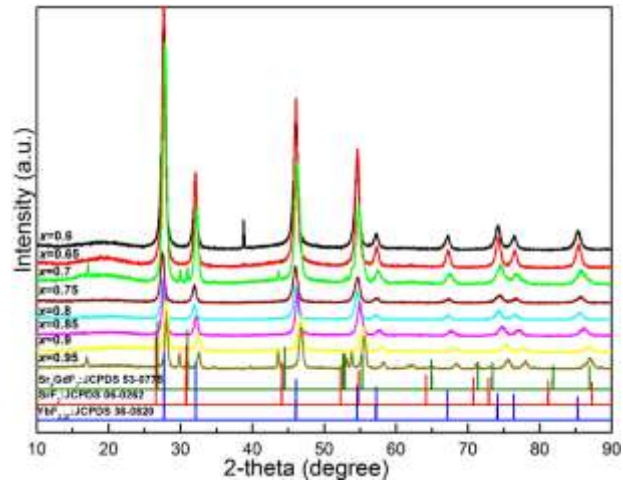

**Fig. S1.** XRD patterns of  $(1-x)\text{SrF}_2 \cdot x\text{YbF}_3$  synthesized:  $0.05 \leq x \leq 0.95$ .

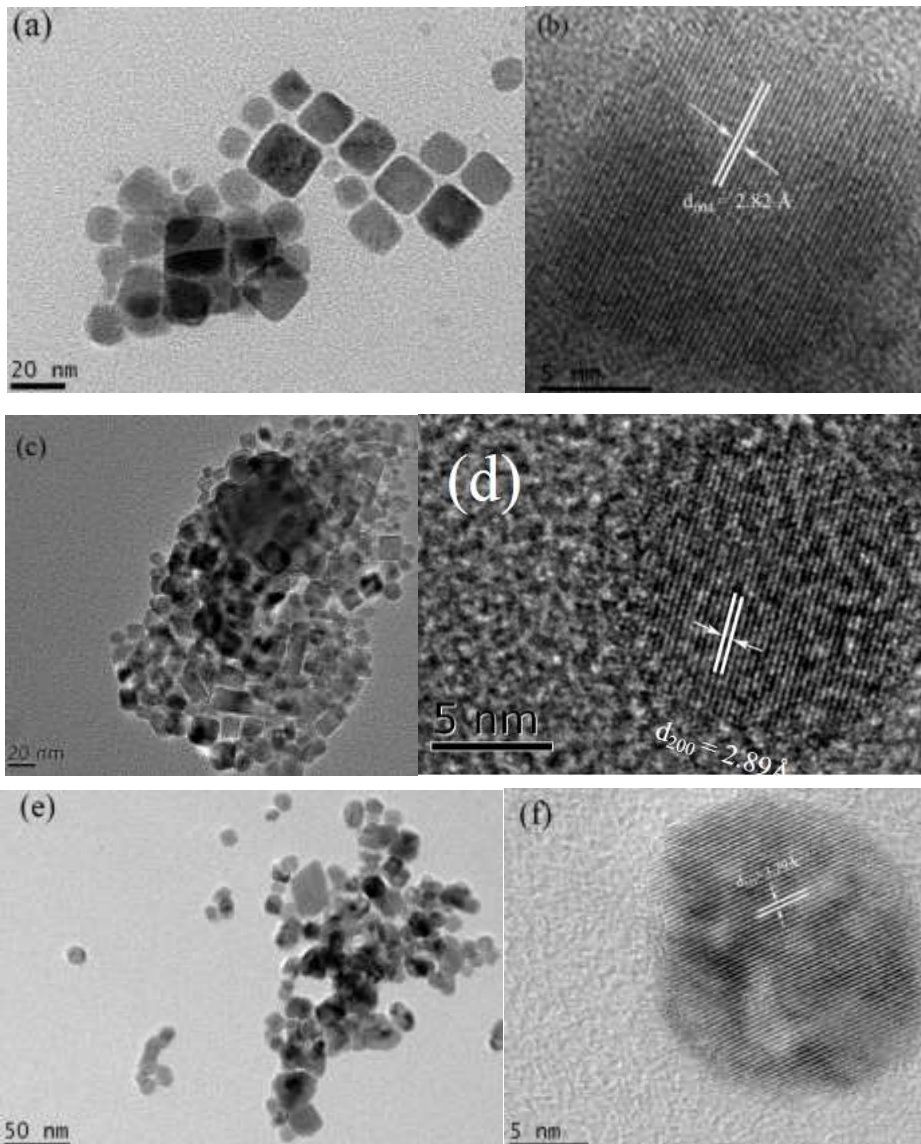

**Fig. S2.** TEM and HRTEM images of  $(1-x)\text{SrF}_2 \cdot x\text{YbF}_3$  synthesized: (a and b)  $x = 0.4$ , (c and d)  $x = 0.1$ , (e and f)  $x = 0.9$ .

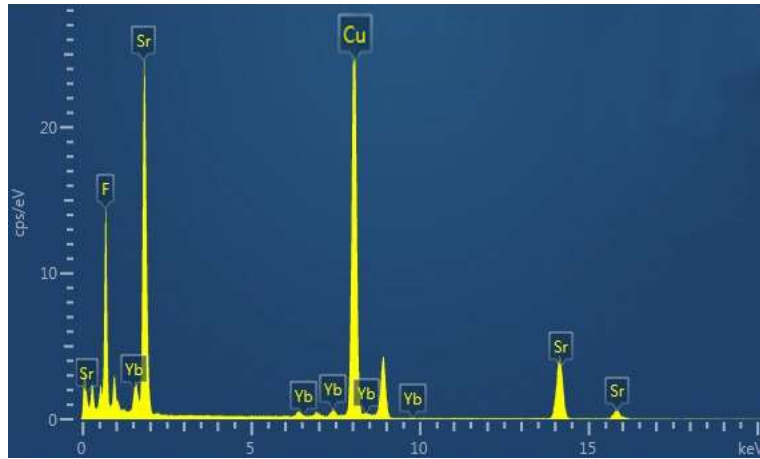

**Fig. S3.** EDS spectra of  $(1-x)\text{SrF}_2 \cdot x\text{YbF}_3$  ( $x = 0.4$ )

**Fig. S3** shows the EDS spectra of  $(1-x)\text{SrF}_2 \cdot x\text{YbF}_3$  ( $x = 0.4$ ). Sr, Yb and F elements could be found in the nanocrystals without other elements.

By tuning the molar ratio of  $\text{Yb}^{3+}$  to  $\text{Sr}^{2+}$  ions, a series of  $(1-x)\text{SrF}_2 \cdot x\text{YbF}_3$  ( $0.05 \leq x \leq 0.95$ ,  $x$  represented  $\text{Yb}^{3+}$  content.) NCs were prepared, and phase structure of  $\text{SrF}_2$ - $\text{YbF}_3$  system was investigated. **Fig. 1** presents the typical XRD patterns of samples synthesized under the similar conditions except  $\text{Yb}^{3+}$  and  $\text{Sr}^{2+}$  ions content, which demonstrates the dependence of phase structure of products on the molar ratio of  $\text{Yb}^{3+}$  to  $\text{Sr}^{2+}$  ions. When  $0.05 \leq x \leq 0.35$ , the diffraction peaks were almost consistent, and the products were the mixture of cubic  $\text{YbF}_{2.37}$  phase (JCPDS 36-0820), cubic  $\text{SrF}_2$  phase (JCPDS 06-0262) and some unknown phases (marked as \*).

With the increase of  $x$ , all the diffraction peaks shifted to larger Bragg angle. When  $x \geq 0.4$ , the diffraction peak \* disappeared. The data of the literature [6] was used as a reference. When  $0.4 \leq x \leq 0.5$  (Fig.1), these peaks were found to be similar to diffraction data of JCPDS 53-0775 just with a slight shifted to larger Bragg angle<sup>6</sup>. Owing to the smaller radius of  $\text{Yb}^{3+}$  (0.0858 nm) than  $\text{Gd}^{3+}$  (0.0938nm), it could be considered the products were pure  $\text{Sr}_2\text{YbF}_7$  phase<sup>6</sup>. Therefore, when  $0.4 \leq x \leq 0.5$ , namely, the molar ratio of  $\text{Sr}^{2+}$  to  $\text{Yb}^{3+}$  was between 3 : 2 and 1: 1, the products were pure  $\text{Sr}_2\text{YbF}_7$  phase.

When  $x = 0.55$ , the products were cubic  $\text{YbF}_{2.37}$  phase (JCPDS 36-0820). As shown in **Fig. 1**, when  $x \geq 0.55$ , the products were not pure  $\text{Sr}_2\text{YbF}_7$  phase. When  $0.6 \leq x \leq$

0.7, some random peaks appeared, the products were mixture phase at these conditions. When  $x = 0.75$ , the diffraction peaks also were consistent with diffraction data of cubic  $\text{YbF}_{2.37}$ . With the increase of  $x$ , namely,  $0.8 \leq x \leq 0.95$ , all the diffraction peaks continued to gradually move to the right. When  $x = 0.95$ , the products were the mixture of hexagonal  $\text{NaYbF}_4$  phase (JCPDS 27-1427) and other unknown phases.

Then, TEM, HRTEM and EDS(**Fig. S2** and **3**) were used to further investigate the effects of  $\text{Yb}^{3+}$  content. The TEM and HRTEM images of  $(1-x)\text{SrF}_2 \cdot x\text{YbF}_3$  ( $x = 0.4$ ) revealed the NCs in relatively uniform shape with the size of about 15 nm and the measured inter-planar distances was about 2.82 Å, corresponding to the (004) lattice plane of tetragonal  $\text{Sr}_2\text{YbF}_7$ , which was consistent with previous XRD results. In addition, the TEM and HRTEM images of  $(1-x)\text{SrF}_2 \cdot x\text{YbF}_3$  ( $x = 0.1$  and  $0.9$ ) NCs indicate also the products were mixture.

**Fig. S2c-d** and **S2e-f** were the TEM and HRTEM images of  $(1-x)\text{SrF}_2 \cdot x\text{YbF}_3$  ( $x = 0.1$  and  $0.9$ ) NCs. As shown in Fig.3 (a, c), the crystalline size distribution of the product was bimodal, i.e, and the ultrasmall NCs coexisted with larger NCs. According to the XRD results shown in Fig.1, the ultrasmall NCs primarily belonged to  $\text{SrF}_2$  NCs, the measured interplanar distances were about 2.89 Å, corresponding to the (200) lattice plane of cubic  $\text{SrF}_2$ . While the large NCs were almost  $\text{YbF}_{2.37}$  NCs and its size was about 30 nm, the measured interplanar distances were about 3.28 Å, corresponding to the (111) lattice plane of cubic  $\text{YbF}_{2.37}$ , which were consistent with XRD results. The EDS spectra of  $\text{Sr}_{1-x}\text{Yb}_x\text{F}_{2+x}$  ( $x = 0.4$ ) showed Sr, Yb and F elements could be found in the nanocrystals without other elements (**Fig. S3**).

As demonstrated above, the  $\text{Yb}^{3+}$  content affects the synthesis of pure phase  $\text{Sr}_2\text{YbF}_7$ , and just apropos molar ratio of  $\text{Sr}^{2+}$  to  $\text{Yb}^{3+}$  (3:2 to 1:1), namely  $x = 0.4-0.5$ , facilitated the formation of pure  $\text{Sr}_2\text{YbF}_7$  phase with uniform size distribution. Thus, the following experiments used the  $(1-x)\text{SrF}_2 \cdot x\text{YbF}_3$  materials as  $x = 0.4$ .

### S3 The characterization of $\text{Sr}_2\text{YbF}_7: \text{Tm}^{3+}$ NCs

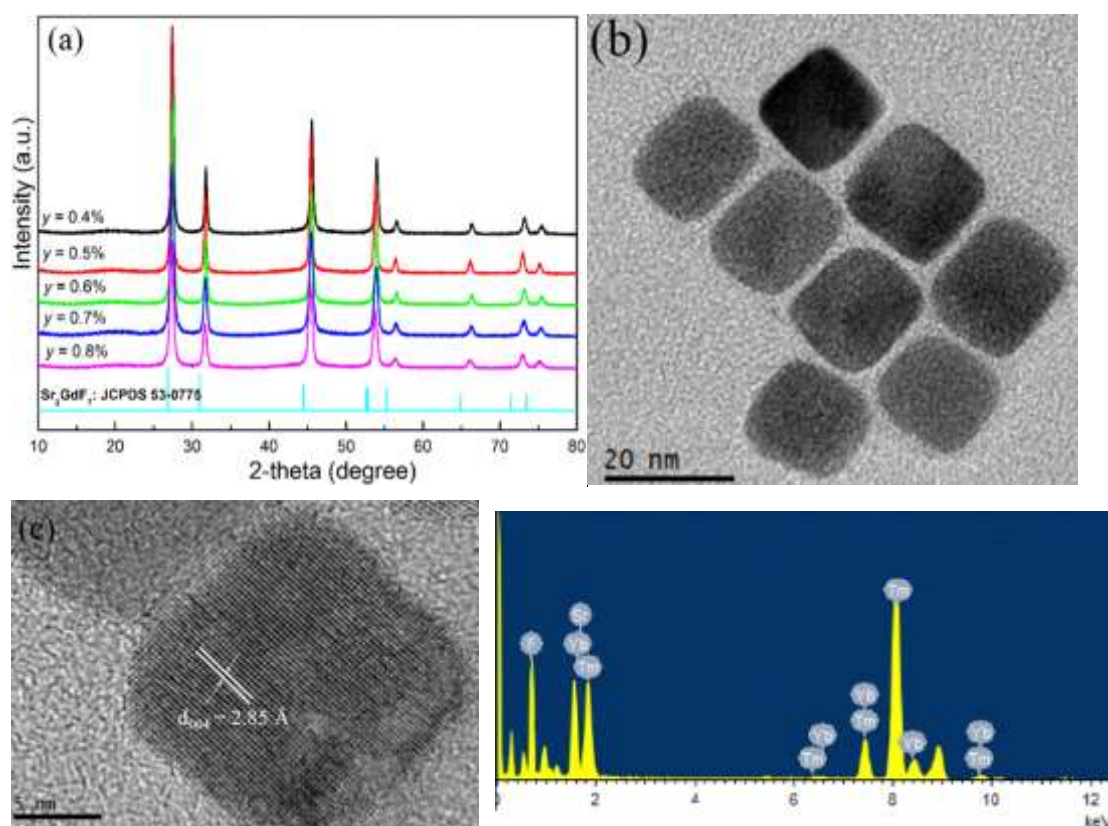

**Fig. S4.** XRD patterns, TEM, HRTEM and EDS images of  $\text{Sr}_2\text{YbF}_7: \text{Tm}^{3+}$  NCs.

To generate upconversion luminescence,  $\text{Tm}^{3+}$  was chosen as luminescence ions. So,  $\text{Sr}_2\text{YbF}_7$  was prepared with the different concentration of  $\text{Tm}^{3+}$  ions doped. **Fig. S4a** shows the typical XRD patterns of  $\text{Sr}_2\text{YbF}_7: \text{Tm}^{3+}$  ( $y$  mol%). The diffraction peaks of XRD patterns are consistent, and similar to diffraction data of JCPDS 53-0775<sup>[5]</sup>. The result indicates that the products are pure phase, and the introduction of minor rare-earth ions has little influence on the preparation of pure phase  $\text{Sr}_2\text{YbF}_7$  NCs. The TEM images (**Fig. S4b**) shows the size of  $\text{Tm}^{3+}$ -doped  $\text{Sr}_2\text{YbF}_7$  NCs with uniform shape are about 15 nm. As shown in Fig.3c, the measured interplanar distances is 2.85 Å, corresponding to the (004) lattice plane of  $\text{Tm}^{3+}$ -doped  $\text{Sr}_2\text{YbF}_7$ , which is close to the interplanar distances of  $\text{Sr}_2\text{YbF}_7$  (2.82 Å) as mentioned above. The results of the XRD, TEM, HRTME and EDS (**Fig. S4**) indicate that  $\text{Tm}^{3+}$  ions successfully enter the  $\text{Sr}_2\text{YbF}_7$  lattice.

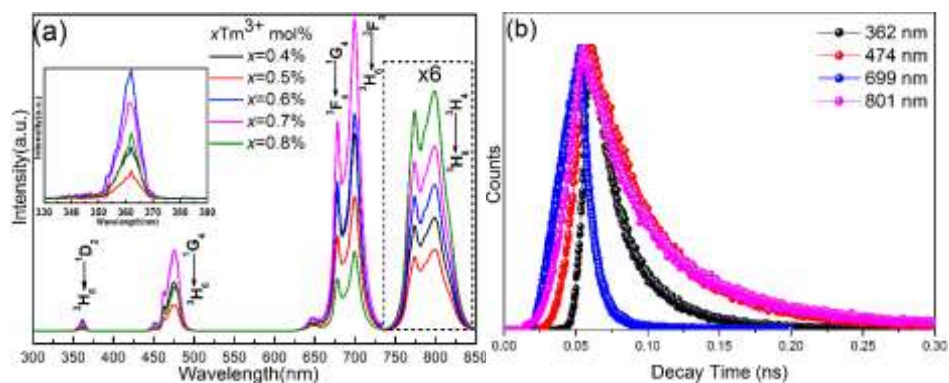

**Fig. S5.** (a) UC emission spectra of  $\text{Sr}_2\text{YbF}_7: \text{Tm}^{3+}$  ( $y$  mol%) NCs; (b) The luminescence decays of the UCNCs@PEG.

S4 Fluorescence images of HeLa cells co-labelled with the UCNCs@PEG

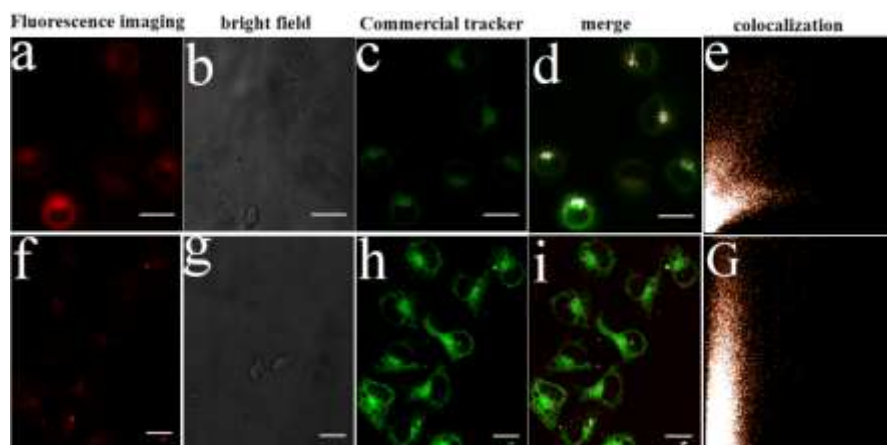

**Fig. S6** Fluorescence images of HeLa cells co-labelled with the UCNCs@PEG, Mito tracker (a-e) and Er tracker (f-G). Scale bar = 20  $\mu\text{m}$ .

S5 The thermogravimetric analysis of the UCNCs@PEG

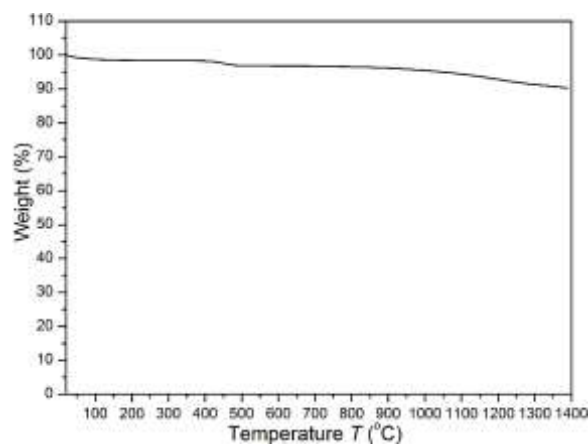

**Fig. S7** TGA curve of the UCNCs@PEG

TGA curve of the UCNCs@PEG (Fig. S7) showed the weight loss of the sample was about 9% at 1260 °C. After this point, no events can be seen until 1400 °C, which indicates that the UCNCs@PEG were exhibiting thermal stability.

## References

- 1 L. J. Xiang, G. Z. Ren, Y. F. Mao, J. He and R. Su, *Optical Materials*, 2015, 49, 6.
- 2 Y. F. Mao, M. Ma, L. J. Gong, C. F. Xu, G. Z. Ren and Q. B. Yang, *Journal of Alloys and Compounds*, 2014, 609, 262.
- 3 J. Zhou, Z. Liu and F.Y. Li, *Chem. Soc. Rev.*, 2012, 41, 1323.
- 4 J.C. Colmenares, M.A. Aramendia, A. Marinas, J.M. Marinas and F.J. Urbano, *Appl. Catal. A Gen.*, 2006, 306, 120.
- 5 Y.N. Tang, W.H. Di, X.S. Zhai, R.Y. Yang and W.P. Qin, *ACS Catal.*, 2013, 3, 405.
- 6 X. M. Li, J. K. Cao, Y. L. Wei, Z. R. Yang, and H. Guo, *J. Am. Ceram. Soc.*, 2015, 98, 3824.
